# Supplementary material
Source: PubMed Central journal article supplement (PMC2615515)
Supplement: M806994200_1.pdf [file M806994200_1.pdf]

Supplemental Methods.

**Cell population analysis:**

For the experiments described in Fig. 1, viral transduction efficiency was approximately 50% and transduced and untransduced cells could not be readily determined in our myocyte  $\text{Ca}^{2+}$  measurement system. Consequently, contributions of non-expressing AVM to the aggregate cell population would likely result in an underestimation of the contribution of PLC $\epsilon$  expression to Iso and cpTOME responsiveness. Population analysis of PLC $\epsilon^{-/-}$  myocytes transduced with wild type PLC $\epsilon$  shows that a significant fraction of the cells had responses to Iso (Supplemental Fig. 1A top panel) or cpTOME (Supplemental Fig. 1B top panel) that were greater than YFP transduced cells. However, Iso- and cpTOME-treated cells transduced with each of the mutant PLC $\epsilon$  viruses showed very few cells with responses greater than YFP transduced cells (Supplemental Fig. 1A and B bottom panels). These results further indicate that PLC $\epsilon$ -Rap-GEF activity, Rap-binding to the RA2 domain and PLC hydrolytic activity are all required for PLC dependent effects on CICR.

## Supplemental Figure Legends

**Supplemental Figure 1.** A) (*upper panel*) Distribution of  $\text{Ca}^{2+}$  transient amplitudes for all  $\text{PLC}\epsilon^{-/-}$  cells transfected with either YFP or wt $\text{PLC}\epsilon$  expressing adenoviruses and treated with isoproterenol. (*lower panel*) Distribution of  $\text{Ca}^{2+}$  transient amplitudes in all  $\text{PLC}\epsilon^{-/-}$  cells transfected with either YFP or various mutant  $\text{PLC}\epsilon$  expressing adenoviruses as indicated and treated with isoproterenol. B) Same as A except stimulated with cpTOME.

**Supplemental Figure 2.** Representative fluorescence (*left*) and phase (*right*) micrographs of Cy3-labeled siRNA transfected myocytes (*upper*) and mock transfected (*lower*) myocytes.

**Supplemental Figure 3.** Representative L-type  $\text{Ca}^{2+}$  currents (*lower black traces*) and intracellular  $\text{Ca}^{2+}$  transients (*upper red traces*) in myocytes from  $\text{PLC}\epsilon^{+/+}$  (A and B) and  $\text{PLC}\epsilon^{-/-}$  mice in both the absence (A and C) and presence (B and D) of  $1\mu\text{M}$  isoproterenol.  $\text{Ca}^{2+}$  currents and transients were elicited by 200 ms depolarizations to test potentials to -50 mV, -20 mV, 0 mV, 30 mV, and 50 mV. The kinetics of  $\text{Ca}^{2+}$  current inactivation for test potentials to 0 mV was fitted by a single exponential function (*green solid lines*). The time constant of inactivation was not significantly different ( $p>0.3$ ) between  $\text{PLC}\epsilon^{+/+}$  ( $\tau_{\text{inact}} = 37.5 \pm 1.9$  ms) and  $\text{PLC}\epsilon^{-/-}$  ( $\tau_{\text{inact}} = 34.9 \pm 1.9$  ms) myocytes under basal conditions. However, in the presence of  $1\mu\text{M}$  isoproterenol, the time constant of inactivation was significantly higher in  $\text{PLC}\epsilon^{-/-}$  myocytes compared to  $\text{PLC}\epsilon^{+/+}$  ( $\text{PLC}\epsilon^{+/+}$ :  $\tau_{\text{inact}} = 19.0 \pm 1.2$  ms;  $\text{PLC}\epsilon^{-/-}$ :  $\tau_{\text{inact}} = 24.6 \pm 1.3$  ms,  $p<0.01$ ). The scale bars shown in D apply to all panels.

**Supplemental Figure 4.** Diagram depicting the Epac/ $\text{PLC}\epsilon$  pathway.

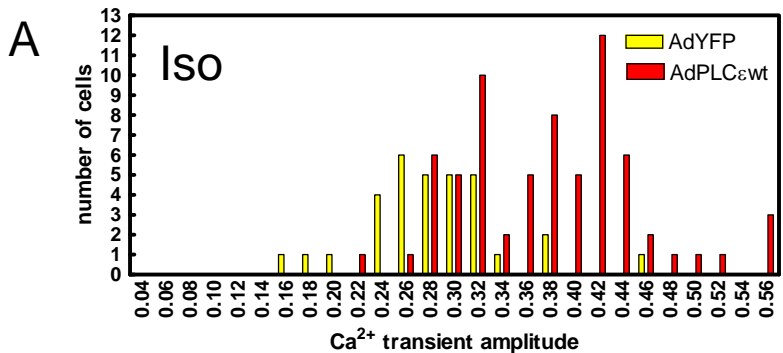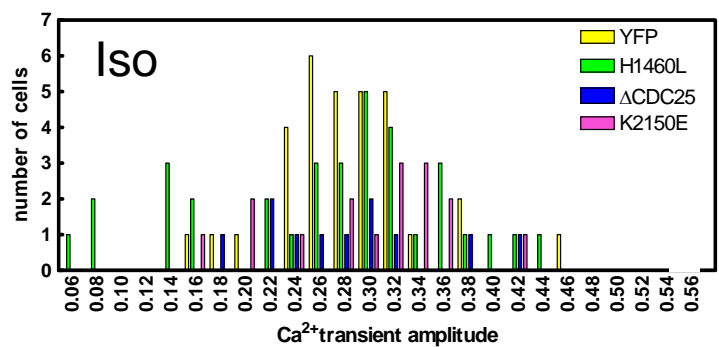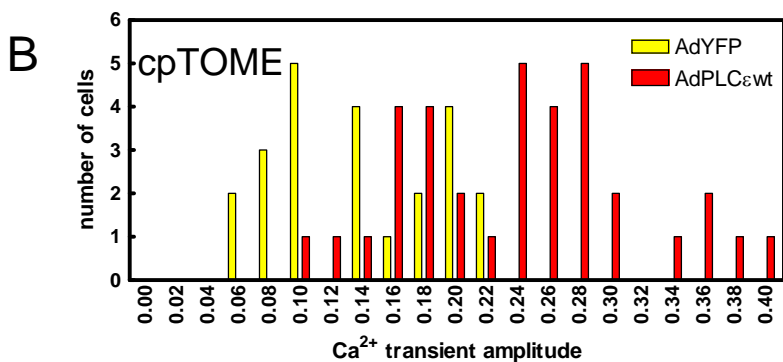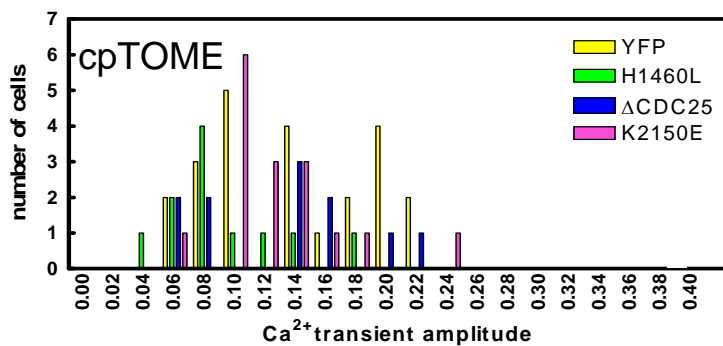

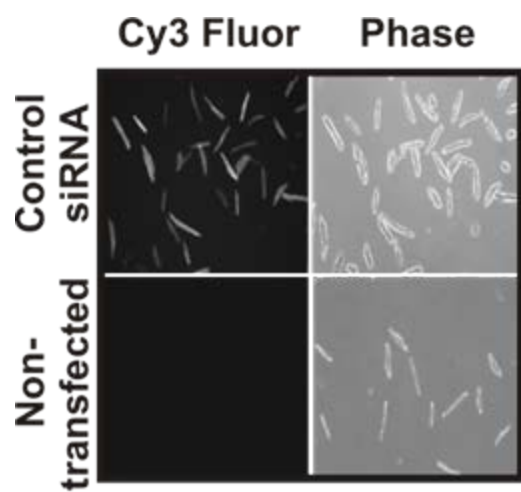

Supplemental  
Figure 2.

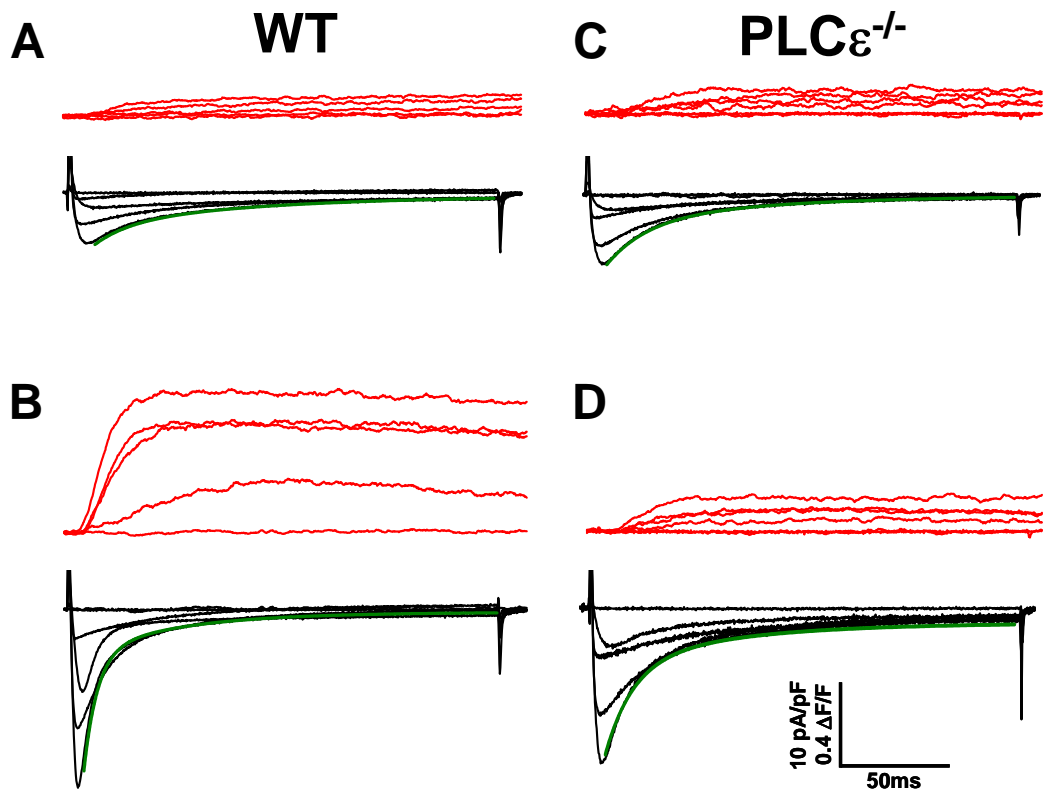

Supplemental Fig. 3

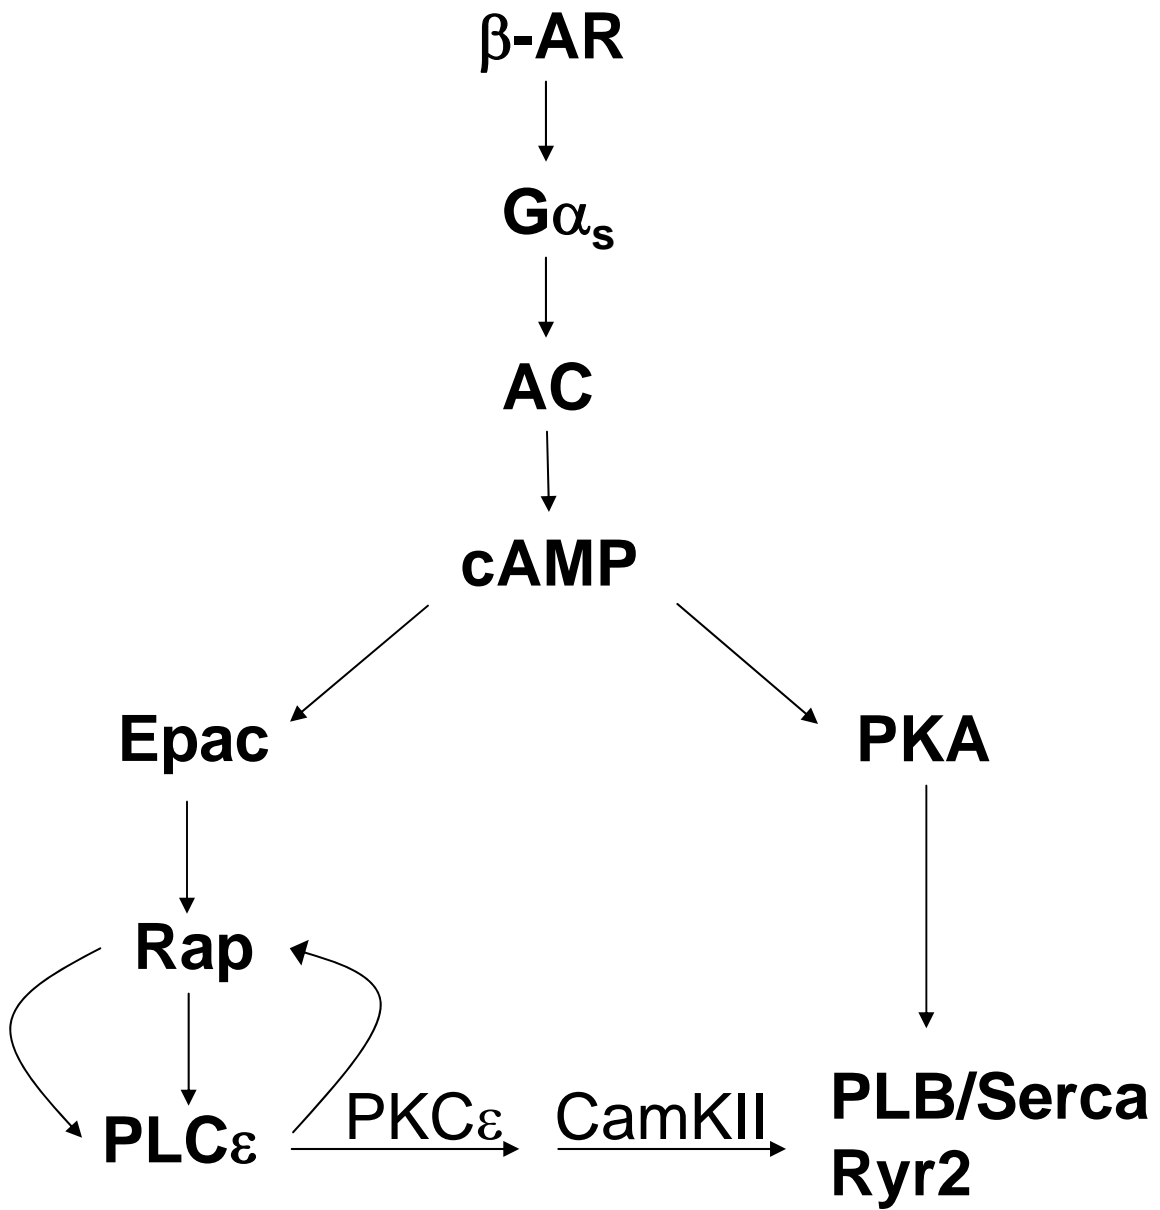

Supplemental Fig. 4
